# Supplementary material for: Predicting Silent Atrial Fibrillation in the Elderly: A Report from the NOMED-AF Cross-Sectional Study
Source: MDPI journal article supplement (doi:10.3390/jcm10112321), 2021-05-26
Supplement: s1 [file s1]

Supplementary Table S1. Definitions of medical conditions included to risk factor analysis if they were not established on the basis on survey and medical records review.

| Name                   | Abbreviation | Definition                                                                                                                                                                                                                                                                                                                             |
|------------------------|--------------|----------------------------------------------------------------------------------------------------------------------------------------------------------------------------------------------------------------------------------------------------------------------------------------------------------------------------------------|
| Arterial Hypertension  | HA           | Average blood pressure values from two measurements during each visit equal to or higher than 140 mmHg (systolic) and/or 90 mmHg (diastolic), or an individual is taking hypotensive drugs over the past 2 weeks because of an earlier diagnosis of hypertension, as per the 2018 ESC/European Society of Hypertension guidelines [7]. |
| Diabetes               | DM           | Hemoglobin A1c was $\geq 6.5\%$ , or if an individual is aware of their diabetes and was taking glucose-lowering agents, in accordance with the 2019 American Diabetes Association and 2019 ESC/European Association for the Study of Diabetes criteria [9,10].                                                                        |
| Chronic Kindey Disease | CKD          | Estimated glomerular filtration rate $< 60$ mL/min/1.73m <sup>2</sup> or $\geq 60$ mL/min/1.73 m <sup>2</sup> with coexisting albuminuria (albumin-tocreatinine ratio $\geq 30$ mg/g) using the 2009 Chronic Kidney Disease Epidemiology Collaboration formula [10-12].                                                                |
| Thyroid diseases       |              | Individual aware of any thyroid disease and/or taking of any thyroid hormone supplementation or thyroid suppressing drugs or level of thyroid hormones out of range                                                                                                                                                                    |
